# Supplementary material
Source: Springer Nature journal article supplement (https://www.springermedizin.de/resource/supplementary/12885_2013_4204_MOESM13_ESM.pdf/9465756)

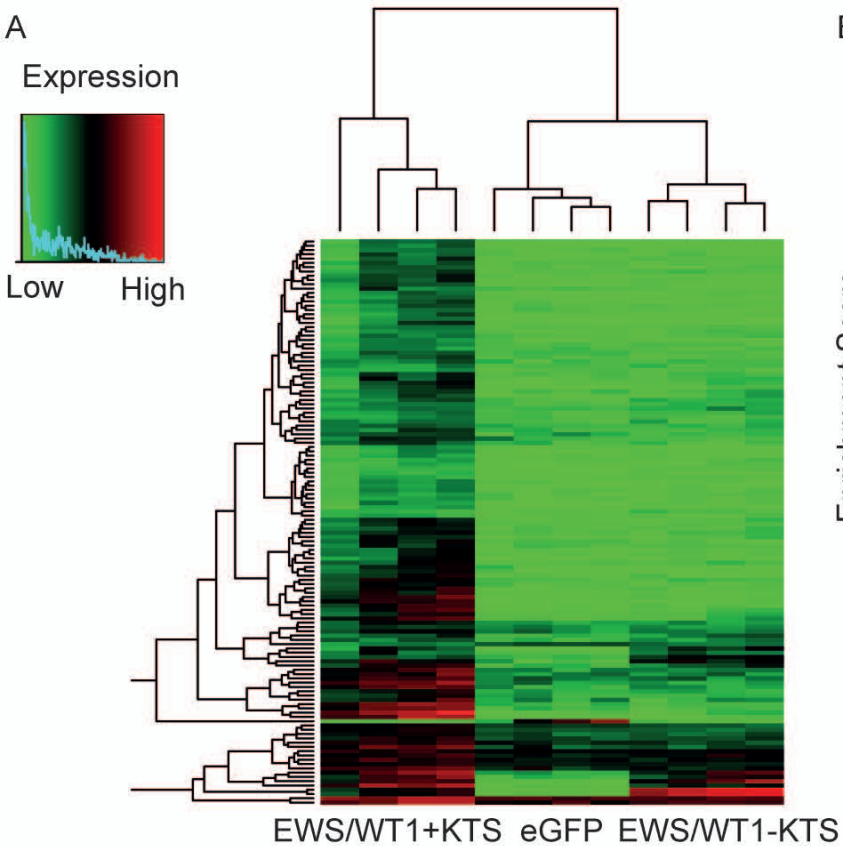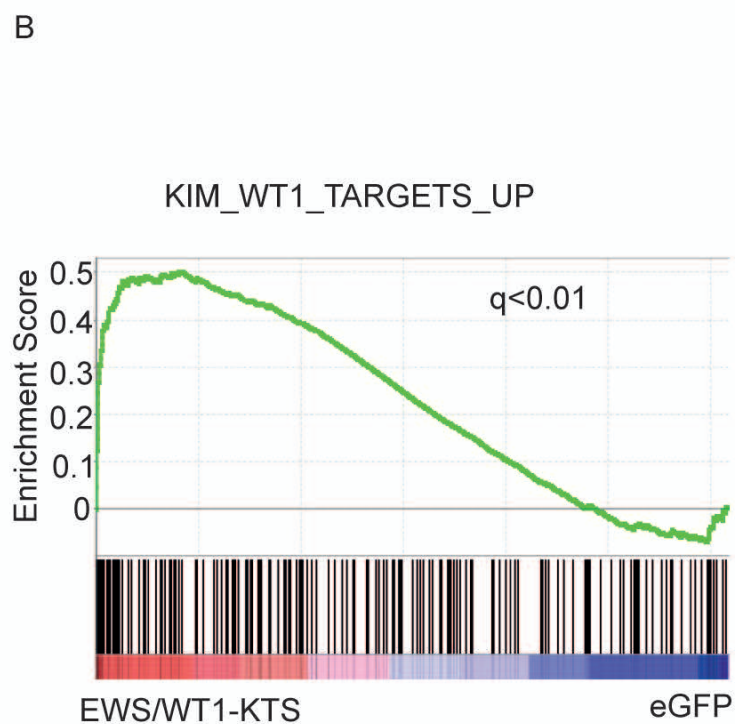

**C**

**WNT related gene sets enriched in EWS/WT1+KTS**

|                                 |       |
|---------------------------------|-------|
| PID_WNT_SIGNALING_PATHWAY       | q<0.2 |
| KEGG_BASAL_CELL_CARCINOMA       | q<0.2 |
| PID_HEDGEHOG_2PATHWAY           | q<0.2 |
| KEGG_HEDGEHOG_SIGNALING_PATHWAY | q<0.2 |

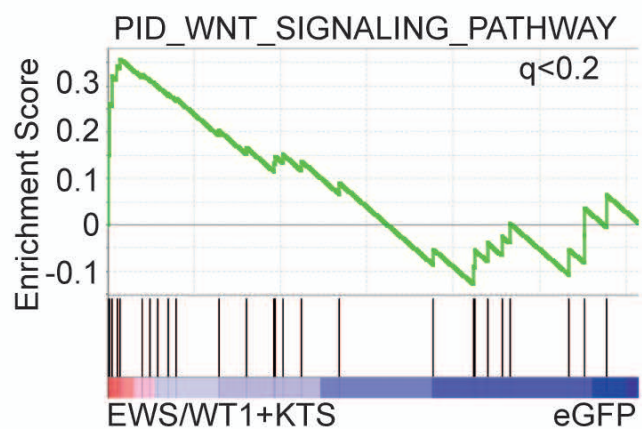

**D**

No Doxycycline

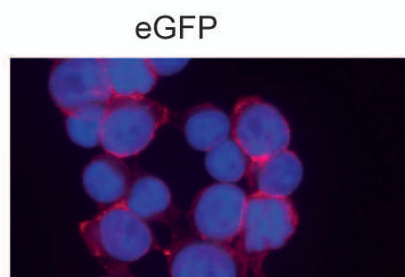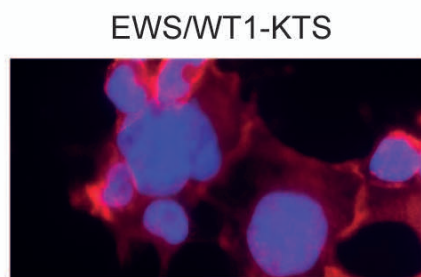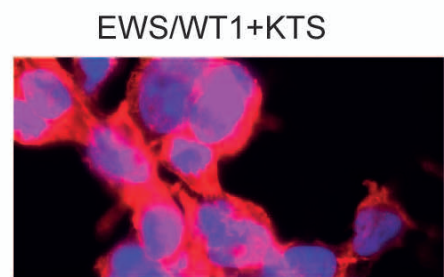

+ Doxycycline

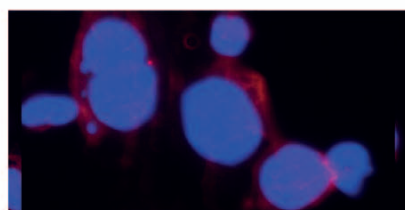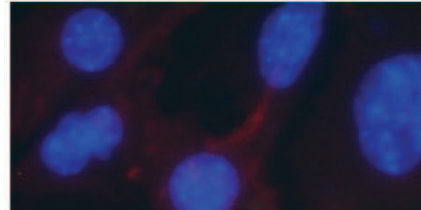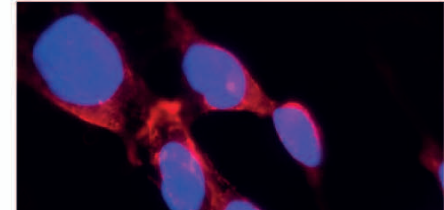

Supplement: MOESM13 [file 9465756]
